# Supplementary material for: Reducing respondent burden: validation of the Brief Impact of Vision Impairment questionnaire
Source: Springer Nature journal article supplement (doi:10.1007/s11136-016-1395-2), 2016-08-24
Supplement: MOESM3 [file 10683150]

**Supplementary Figure S3. Relationship between Brief IVI person measures and severity of vision impairment.** This figure shows that as severity of vision
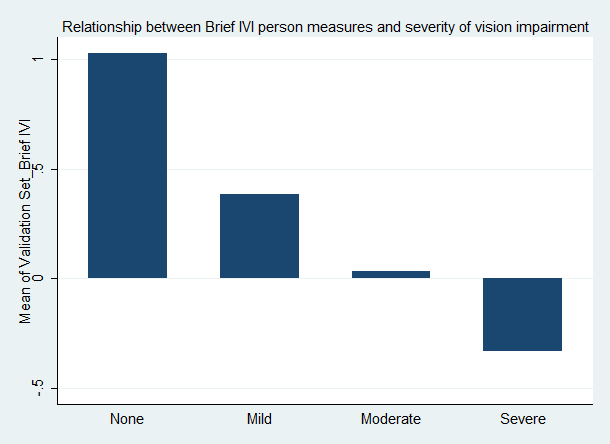
impairment worsens, mean Brief IVI scores systematically decrease

**Title**: Reducing respondent burden: validation of the Brief Impact of Vision Impairment questionnaire

**Journal**: Quality of Life Research

**Authors:** Eva K Fenwick, PhD1,2,4; Ryan EK Man2, Gwyn Rees, PhD 1; Jill Keeffe, PhD1; Tien Y Wong, PhD1, 2, 3, 4; Ecosse L Lamoureux, PhD1, 2, 3, 4

1. Centre for Eye Research Australia, Royal Victorian Eye and Ear Hospital, University of Melbourne, Australia
2. Singapore Eye Research Institute, Singapore National Eye Centre, Singapore
3. Department of Ophthalmology, National University of Singapore and National University Health System, Singapore
4. Duke-NUS Graduate Medical School, Singapore

Email: [ecosse.lamoureux@duke-nus.edu.sg](mailto:ecosse.lamoureux@duke-nus.edu.sg)
