# Supplementary material for: Reducing respondent burden: validation of the Brief Impact of Vision Impairment questionnaire
Source: Springer Nature journal article supplement (doi:10.1007/s11136-016-1395-2), 2016-08-24
Supplement: MOESM4 [file 10683150]

| **Supplementary Table S1. The items in the original IVI and Brief IVI and corresponding subscales** | | | |
| --- | --- | --- | --- |
| **Item no.** | **28-item IVI** | **Brief IVI** | **Scale** |
| 1 | Your ability to see and enjoy TV | *Deleted* | - |
| 2 | Taking part in recreational activities such as bowling, walking or golf | *Deleted* | - |
| 3 | Shopping (finding what you want and paying for it) | *Deleted* | - |
| 4 | Visiting friends or family | *Deleted* | - |
| 5 | Recognising or meeting people | Item 1 | VF |
| 6 | Generally looking after your appearance (face, hair, clothing etc.) | *Deleted* | - |
| 7 | Opening packaging (for example, around food, medicines) | *Deleted* | - |
| 8 | Reading labels or instructions on medicines | Item 2 | VF |
| 9 | Operating household appliances and the telephone | Item 3 | VF |
| 10 | How much has your eyesight interfered with getting about outdoors (on the pavement or crossing the street) | *Deleted* | - |
| 11 | How often has your eyesight made you go carefully to avoid falling or tripping | Item 4 | VF |
| 12 | In general, how much has your eyesight interfered with travelling or using transport (bus & train) | *Deleted* | - |
| 13 | Going down steps, stairs and curbs | *Deleted* | - |
| 14 | Reading ordinary size print (for example newspapers) | Item 5 | VF |
| 15 | Getting information that you need | *Deleted* | - |
| 16 | Your general safety at home | Item 6 | VF |
| 17 | Spilling or breaking things | Item 7 | VF |
| 18 | Your general safety when out of your home | Item 8 | VF |
| 19 | How often has your eyesight stopped you from doing the things you want to do | *Deleted* | - |
| 20 | How often have you needed help from other people because of your eyesight | Item 9 | VF |
| 21 | Have you felt embarrassed because of your eyesight | *Deleted* | - |
| 22 | Have you felt frustrated or annoyed because of your eyesight | Item 10 | EWB |
| 23 | Have you felt lonely or isolated because of your eyesight | Item 11 | EWB |
| 24 | Have you felt sad or low because of your eyesight | *Deleted* | - |
| 25 | How often have you worried about your eyesight getting worse | Item 12 | EWB |
| 26 | How often has your eyesight made you concerned or worried about coping with everyday life | Item 13 | EWB |
| 27 | Have you felt like a nuisance or burden because of your eyesight | Item 14 | EWB |
| 28 | How much has your eyesight interfered with your life in general | Item 15 | EWB |
| EWB=Emotional well-being; IVI=Impact of Vision Impairment; VF=Visual functioning | | | |

**Title**: Reducing respondent burden: validation of the Brief Impact of Vision Impairment questionnaire

**Journal**: Quality of Life Research

**Authors:** Eva K Fenwick, PhD1,2,4; Ryan EK Man2, Gwyn Rees, PhD 1; Jill Keeffe, PhD1; Tien Y Wong, PhD1, 2, 3, 4; Ecosse L Lamoureux, PhD1, 2, 3, 4

1. Centre for Eye Research Australia, Royal Victorian Eye and Ear Hospital, University of Melbourne, Australia
2. Singapore Eye Research Institute, Singapore National Eye Centre, Singapore
3. Department of Ophthalmology, National University of Singapore and National University Health System, Singapore
4. Duke-NUS Graduate Medical School, Singapore

Email: [ecosse.lamoureux@duke-nus.edu.sg](mailto:ecosse.lamoureux@duke-nus.edu.sg)
