# Supplementary material for: Reducing respondent burden: validation of the Brief Impact of Vision Impairment questionnaire
Source: Springer Nature journal article supplement (doi:10.1007/s11136-016-1395-2), 2016-08-24
Supplement: MOESM7 [file 10683150]

| Supplementary Table S4. Psychometric properties of the Brief IVI scale, and Brief IVI Functioning and IVI Emotional subscales in the development and validation set | | | | | | | |
| --- | --- | --- | --- | --- | --- | --- | --- |
|  |  | *Development Set* | | | *Validation Set* | | |
| Parameters | Rasch model limits of acceptability | Brief IVI (n=413) | IVI Functioning (n=413) | IVI Emotional (n=409) | Brief IVI (n=415) | IVI Functioning (n=415) | IVI Emotional (n=409) |
| Items |  | 5, 8, 9, 11, 14, 16-18, 20, 22-23, 25-28 | 5, 8, 9, 11, 14, 16-18, 20 | 22, 23, 25-28 | 5, 8, 9, 11, 14, 16-18, 20, 22-23, 25-28 | 5, 8, 9, 11, 14, 16-18, 20 | 22, 23, 25-28 |
| Disordered thresholds | No | No | No | No | No | No | No |
| Person separation index | >2.0 | 2.58 | 2.04 | 2.04 | 2.62 | 2.08 | **1.98** |
| Person reliability | >0.8 | 0.87 | 0.81 | 0.81 | 0.87 | 0.81 | 0.80 |
| PCA, variance by 1st factor | >50% | 50.1% | 55.2% | 57.4% | 51.1% | 55.9% | 57.2% |
| PCA, Eigenvalue for 1st contrast & % unexplained variance in 1st contrast | <3.0, <5.0% | **2.3** | 1.9 | 1.5 | 2.1 | 2.0 | 1.6 |
| Item fit (infit MnSq) | <1.3 | **Item 8 (1.32)** | None | None | None | None | None |
| Item fit (outfit MnSq) | <1.3 | None | None | None | None | None | None |
| Local item dependency (LID) | >0.3 | **Items 8 & 14 (0.39)** | **Items 8 & 14 (0.31)** | None | **Items 8 & 14 (0.37)**  **Items 25 & 26 (0.32)** | **Items 8 & 14 (0.31)** | None |
| DIFf | <1.0 logits and p<0.05 | None | None | None | None | None | None |
| Measurement range | - | 3.57 | 3.79 | 2.47 | 3.46 | 3.75 | 2.56 |
| Targeting, difference between person & item means | <1.0 logits | 0.03* | -0.06* | 0.16† | 0.12‡ | 0.06§ | 0.27|| |
| *Ceiling effect: 3 (0.07%); †Ceiling effect: 12 (2.9%) ‡Ceiling effect: 1 (0.24%); §Ceiling effect: 4 (0.96%); ||Ceiling effect: 17 (4.1%)  fDIF was assessed for age group, gender, vision impairment (none/mild vs. moderate/severe).  Bolded values indicate misfit to the Rasch model. | | | | | | | |

**Title**: Reducing respondent burden: validation of the Brief Impact of Vision Impairment questionnaire

**Journal**: Quality of Life Research

**Authors:** Eva K Fenwick, PhD1,2,4; Ryan EK Man2, Gwyn Rees, PhD 1; Jill Keeffe, PhD1; Tien Y Wong, PhD1, 2, 3, 4; Ecosse L Lamoureux, PhD1, 2, 3, 4

1. Centre for Eye Research Australia, Royal Victorian Eye and Ear Hospital, University of Melbourne, Australia
2. Singapore Eye Research Institute, Singapore National Eye Centre, Singapore
3. Department of Ophthalmology, National University of Singapore and National University Health System, Singapore
4. Duke-NUS Graduate Medical School, Singapore

Email: [ecosse.lamoureux@duke-nus.edu.sg](mailto:ecosse.lamoureux@duke-nus.edu.sg)
